# Supplementary material for: A succinonitrile-infiltrated silica aerogel synergistically-reinforced hybrid solid electrolyte for durable solid-state lithium metal batteries
Source: Royal Society of Chemistry journal article supplement (doi:10.1039/d1qm01508g), 2022-01-01
Supplement: d1qm01508g1.pdf [file d1qm01508g1.pdf]

## Supporting Information

A succinonitrile infiltrated silica aerogel synergistically-reinforced hybrid  
solid electrolyte for durable solid-state lithium metal batteries

Ling Liu<sup>a</sup>, Yinghui Cai<sup>a</sup>, Zhikun Zhao<sup>a</sup>, Borong Wu<sup>a</sup>, Chunli Li<sup>a, \*</sup>, Daobin

Mu<sup>a,b,\*</sup>

<sup>a</sup>Beijing Key Laboratory of Environmental Science and Engineering, School of Materials Science and Engineering, Beijing Institute of Technology, Beijing, 100081, PR China

<sup>b</sup>Guangdong Key Laboratory of Battery Safety, Guangzhou Institute of Energy Testing, Guangzhou 511447, PR China

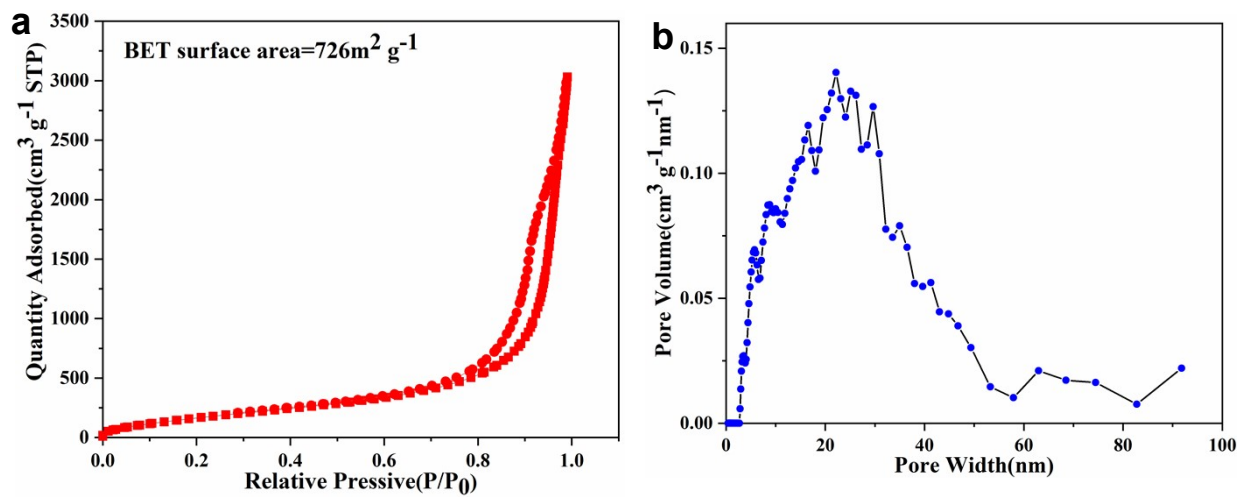

Fig. S1 BET surface area (a) and pore size distribution (b)

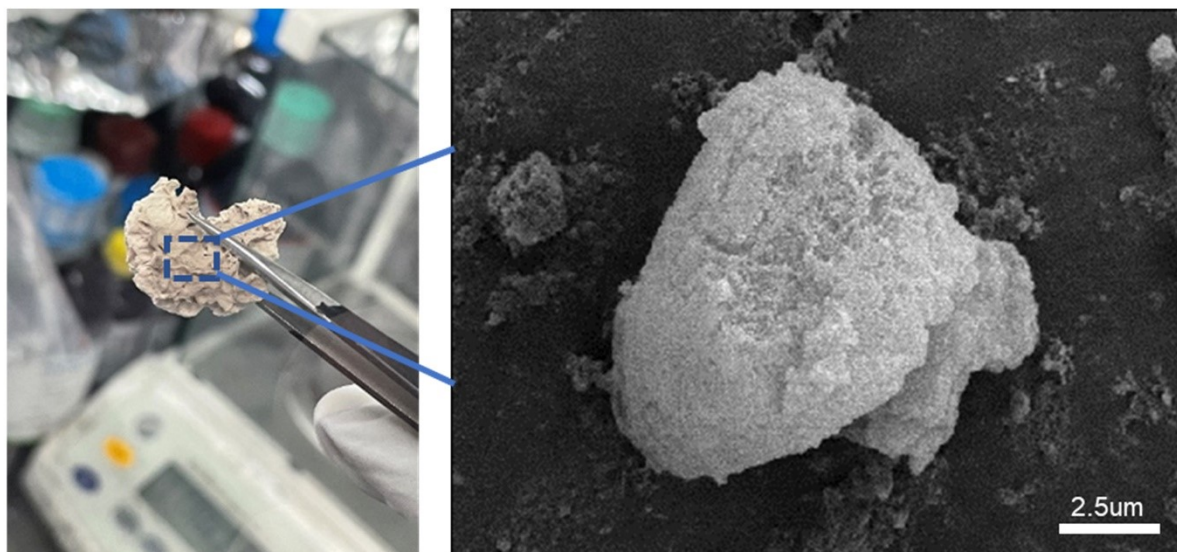

Fig. S2 The digital image (left) and SEM image (right) of SNE@SAG precursor

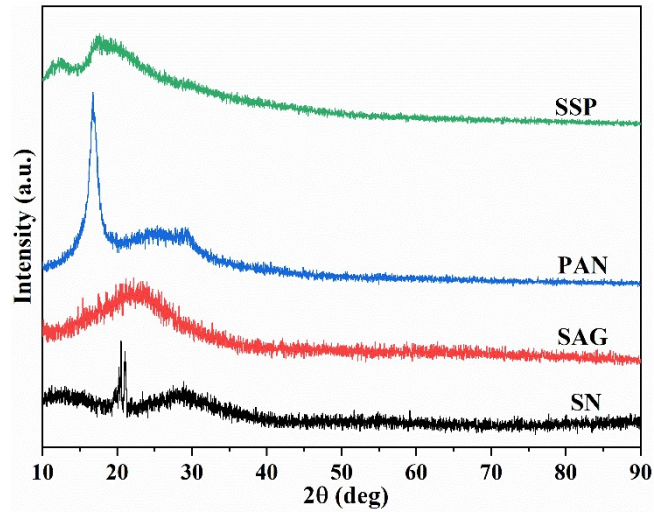

Fig. S3 XRD patterns of SSP, PAN, SAG and SN

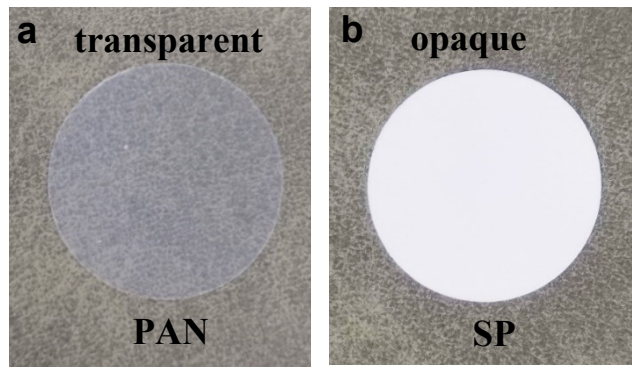

Fig. S4 The images of PAN (a) and SP (b) membranes

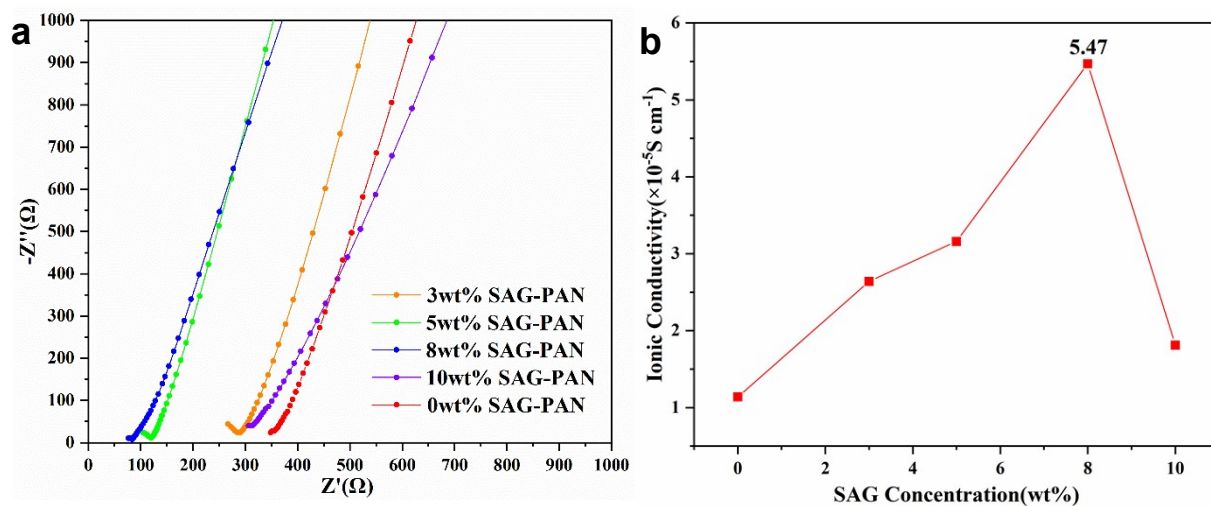

Fig. S5 The EIS curves of SAG-PAN HSEs with different SAG content (a) and the corresponding ionic conductivity (b)

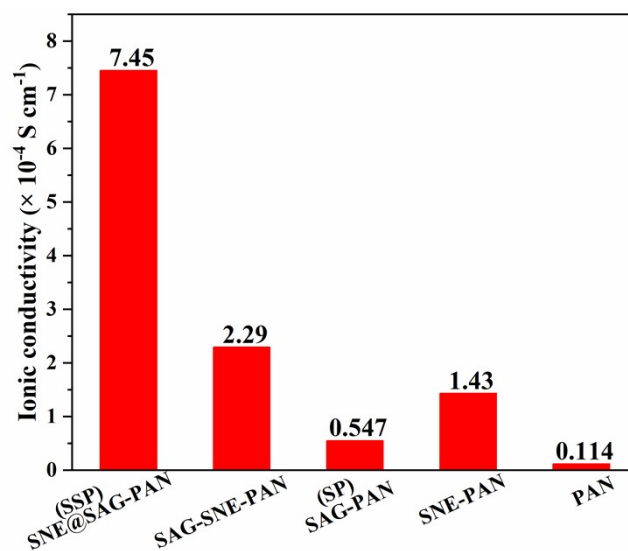

Fig. S6 The comparison of ionic conductivity of different HSEs in this work

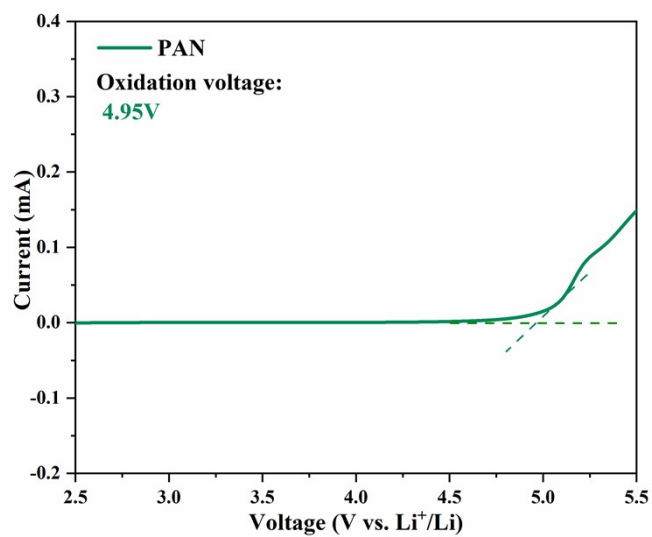

Fig. S7 The linear sweep voltammetry (LSV) tests of PAN



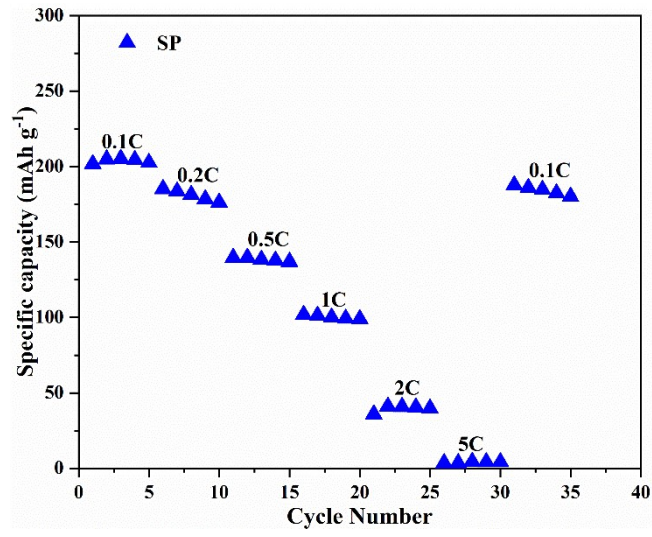

Fig. S8 The rate performance of NCM811/SP/Li cell

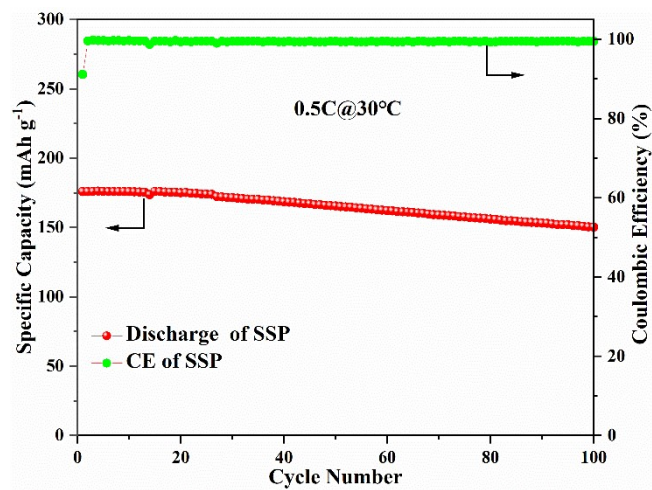

Fig. S9 The cycling performance of NCM811/SSP/Li cell at 0.5C

Table S1 FTIR peak positions and percentage of C≡N peak area for PAN, SP and SSP

| Sample | Unbonded C≡N        |      | Bonded C≡N          |      |
|--------|---------------------|------|---------------------|------|
|        | (cm <sup>-1</sup> ) | (%)  | (cm <sup>-1</sup> ) | (%)  |
| PAN    | 2243                | 84.4 | 2254                | 15.6 |
| SP     | 2242                | 61   | 2251                | 39   |
| SSP    | 2243                | 90   | 2255                | 10   |

Table S2 Battery properties of the recent reports and this work

| HSEs                           | Cathode       | 1st discharge capacity (0.1C)    | Cycling performance                                                                     | Ref.             |
|--------------------------------|---------------|----------------------------------|-----------------------------------------------------------------------------------------|------------------|
| PTFE-LLZTO-SN                  | NCM523        | 158 mAh g <sup>-1</sup>          | 90.7% capacity retention after 100 cycles at 0.1C                                       | S1               |
| PTFE-PVDF-HFP-LiTFSI/LiBOB-ADN | NCM811        | 168 mAh g <sup>-1</sup>          | 78.3% capacity retention after 1000 cycles at 2C                                        | S2               |
| PI-PVDF-LLZTO                  | NCM523        | 161 mAh g <sup>-1</sup>          | 94.9% capacity retention after 80 cycles at 0.1C                                        | S3               |
| PVDF-LLZTO                     | NCM111        | 200.3mAh g <sup>-1</sup> (0.05C) | ~62% capacity retention after 100 cycles at 0.2C                                        | S4               |
| PAN-PAN@LAGP-PEGDA             | NCM622        | 180 mAh g <sup>-1</sup>          | 81.5% capacity retention after 270 cycles at 0.5C                                       | S5               |
| PVDF-HFP/LLZTO-PEO             | NCM111        | 123 mAh g <sup>-1</sup>          | 85.3% capacity retention after 100 cycles at 0.2C                                       | S6               |
| PEO-SAG                        | LFP           | /                                | 85% capacity retention after 200 cycles at 0.5C                                         | S7               |
| <b>SNE@SAG-PAN</b>             | <b>NCM811</b> | <b>200.5 mAh g<sup>-1</sup></b>  | <b>capacity retention : 86% after 100 cycles at 0.5C , 73.2% after 200 cycles at 1C</b> | <b>This work</b> |

## References

- S1 T. L. Jiang, P. G. He, G. X. Wang, Y. Shen, C. W. Nan and L. Z. Fan, Solvent-Free Synthesis of Thin, Flexible, Nonflammable Garnet-Based Composite Solid Electrolyte for All-Solid-State Lithium Batteries, *Adv. Energy Mater.*, 2020, 10, 10.
- S2 X. D. Lin, J. Yu, M. B. Effat, G. D. Zhou, M. J. Robson, S. C. T. Kwok, H. J. Li, S. Y. Zhan, Y. L. Shang and F. Ciucci, Ultrathin and Non-Flammable Dual-Salt Polymer Electrolyte for High-Energy-Density Lithium-Metal Battery, *Advanced Functional Materials*, 2021, 31, 8.

- S3 J. K. Hu, P. G. He, B. C. Zhang, B. Y. Wang and L. Z. Fan, Porous film host-derived 3D composite polymer electrolyte for high-voltage solid state lithium batteries, *Energy Storage Mater.*, 2020, 26, 283-289.
- S4 J. Yu, Y. Q. Lyu, J. P. Liu, M. B. Effat, S. C. T. Kwok, J. X. Wu and F. Ciucci, Enabling non-flammable Li-metal batteries via electrolyte functionalization and interface engineering, *J. Mater. Chem. A*, 2019, 7, 17995-18002.
- S5 H. Duan, M. Fan, W. P. Chen, J. Y. Li, P. F. Wang, W. P. Wang, J. L. Shi, Y. X. Yin, L. J. Wan and Y. G. Guo, Extended Electrochemical Window of Solid Electrolytes via Heterogeneous Multilayered Structure for High-Voltage Lithium Metal Batteries, *Adv. Mater.*, 2019, 31, 7.
- S6 Z. R. Yao, K. J. Zhu, X. Li, J. Zhang, J. Li, J. Wang, K. Yan and J. S. Liu, Double-Layered Multifunctional Composite Electrolytes for High-Voltage Solid-State Lithium-Metal Batteries, *ACS Appl. Mater. Interfaces*, 2021, 13, 11958-11967.
- S7 D. C. Lin, P. Y. Yuen, Y. Y. Liu, W. Liu, N. Liu, R. H. Dauskardt and Y. Cui, A Silica-Aerogel-Reinforced Composite Polymer Electrolyte with High Ionic Conductivity and High Modulus, *Adv. Mater.*, 2018, 30, 8.
